# Supplementary material
Source: PubMed Central journal article supplement (PMC9171264)
Supplement: mmc1.pdf [file mmc1.pdf]

## **Supplemental Information**

### **Intercellular transfer of miR-200c-3p impairs the angiogenic capacity of cardiac endothelial cells**

**Lara Ottaviani, Rio P. Juni, Ricardo C. de Abreu, Marida Sansonetti, Vasco Sampaio-Pinto, Julie Halkein, Jana C. Hegenbarth, Nadja Ring, Kevin Knoops, Jordy M.M. Kocken, Carlos de Jesus, Auriane C. Ernault, Hamid el Azzouzi, Frank Rühle, Servé Olieslagers, Hugo Fernandes, Lino Ferreira, Luca Braga, Monika Stoll, Diana S. Nascimento, Leon J. de Windt, and Paula A. da Costa Martins**

# Supplemental Figure 1

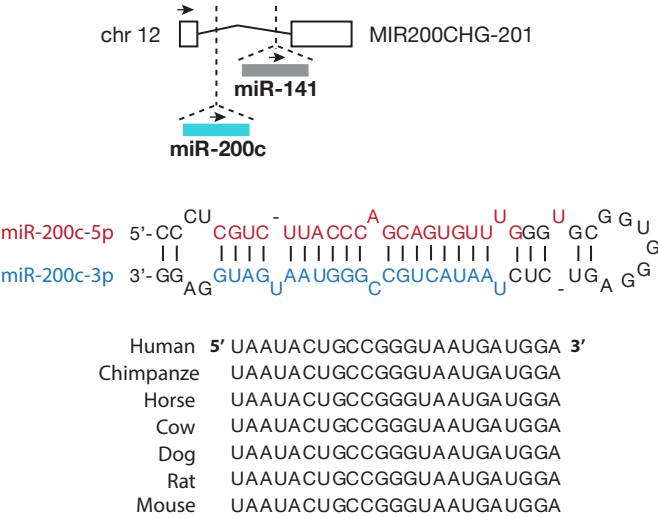

**Supplemental Figure 1** | Schematic representation of hsa-miR-200c-3p genomic localisation (upper panel) and precursor sequence showing that the mature strand of miR-200c-3p is conserved among species (lower panel).

## Supplemental Figure 2

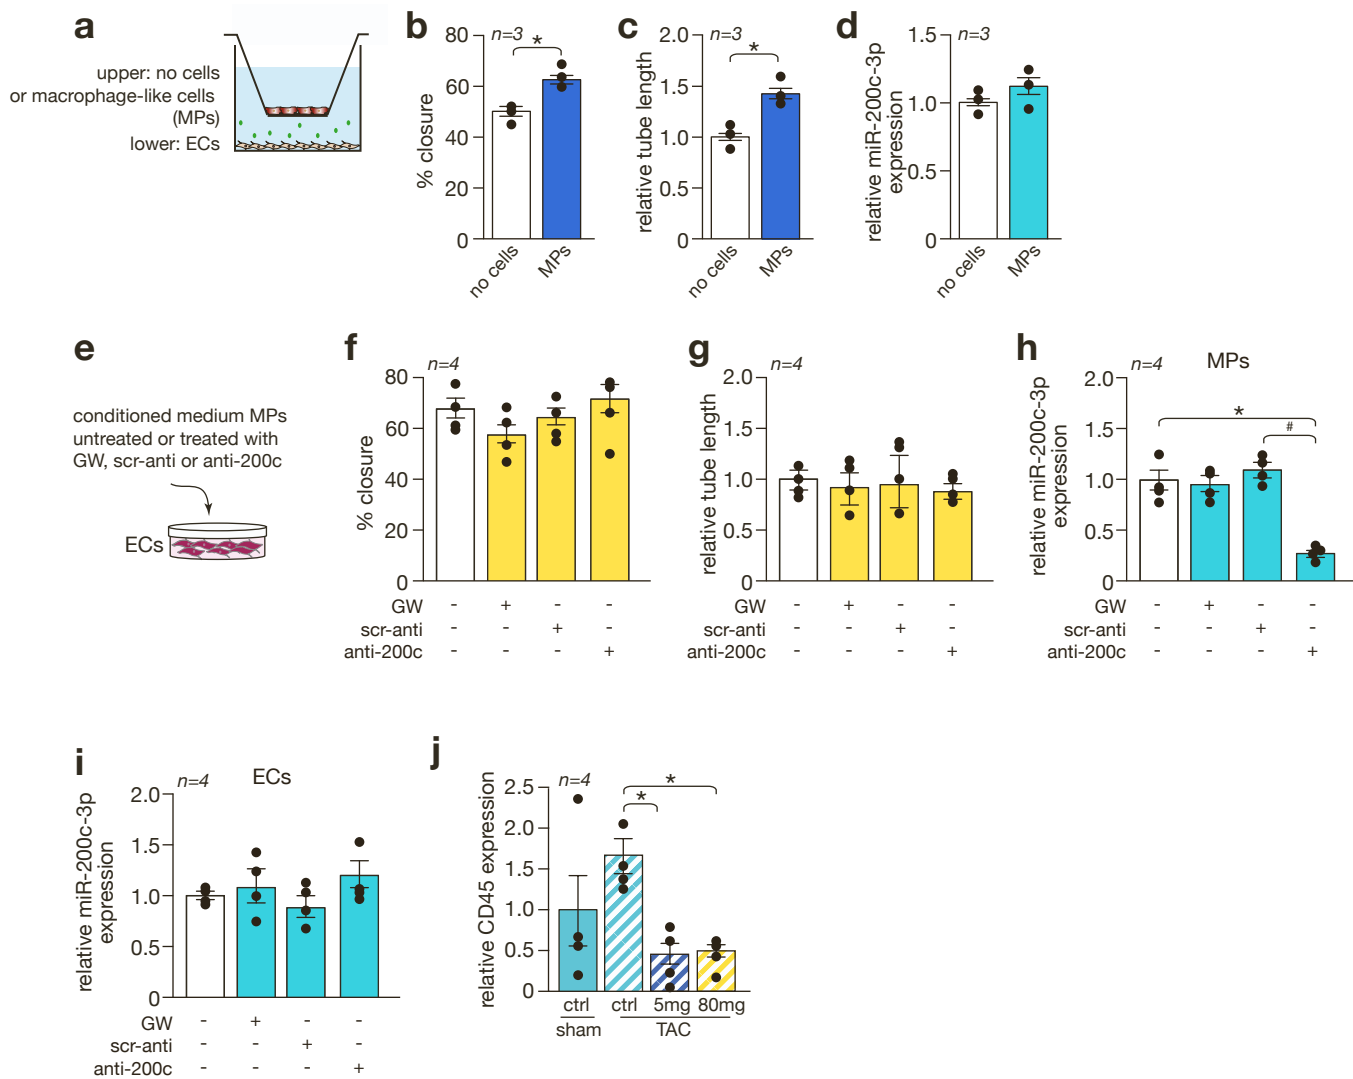

**Supplemental Figure 2 | (a)** Experimental setup of transwell coculture system with macrophage-like cells (MPs) in the upper well and HUVECs in the lower one. **(b)** Assessment of EC migration by quantification of wound closure within 24hr hours on HUVECs after 72h in co-culture with MPs, or no cells in the upper compartment. \*p<0.05 versus control "no cells". **(c)** Quantification of tube formation by determining relative tube length. a,b: \*p<0.05 versus control "no cells". **(d)** Real-time PCR analysis of miR-200c-3p expression in ECs, cocultured with MPs or not. **(e)** Experimental setup of adding conditioned medium from MPs to cultured HUVECs. Conditioning medium was from macrophage-like cells that were untreated or treated with GW4869, or transfected either with a control inhibitor or a miR-200c-3p specific inhibitor. **(f)** Assessment of EC migration by quantification of wound closure within 24hr hours on HUVECs after 72h in co-culture with MPs, or no cells in the upper compartment. **(g)** Quantification of tube formation by determining relative tube length. **(h)** Real-time PCR analysis of miR-200c-3p expression in untreated MPs or upon treatment with GW4869, or transfected either with a control inhibitor or a miR-200c-3p specific inhibitor. \*p<0.05 versus untreated cells, #p<0.05 versus anti-200c. **(i)** Real-time PCR analysis of miR-200c-3p expression in ECs upon incubation with conditioned medium from untreated MPs or treated with GW4869; transfected either with a control inhibitor or a miR-200c-3p specific inhibitor. **(j)** Real-time PCR analysis of CD45 expression in animals subjected to TAC or sham surgery, and either left untreated or treated with low/high doses of antagonist. \*p<0.05 versus the control TAC. Error bars are s.e.m.

# Supplemental Figure 3

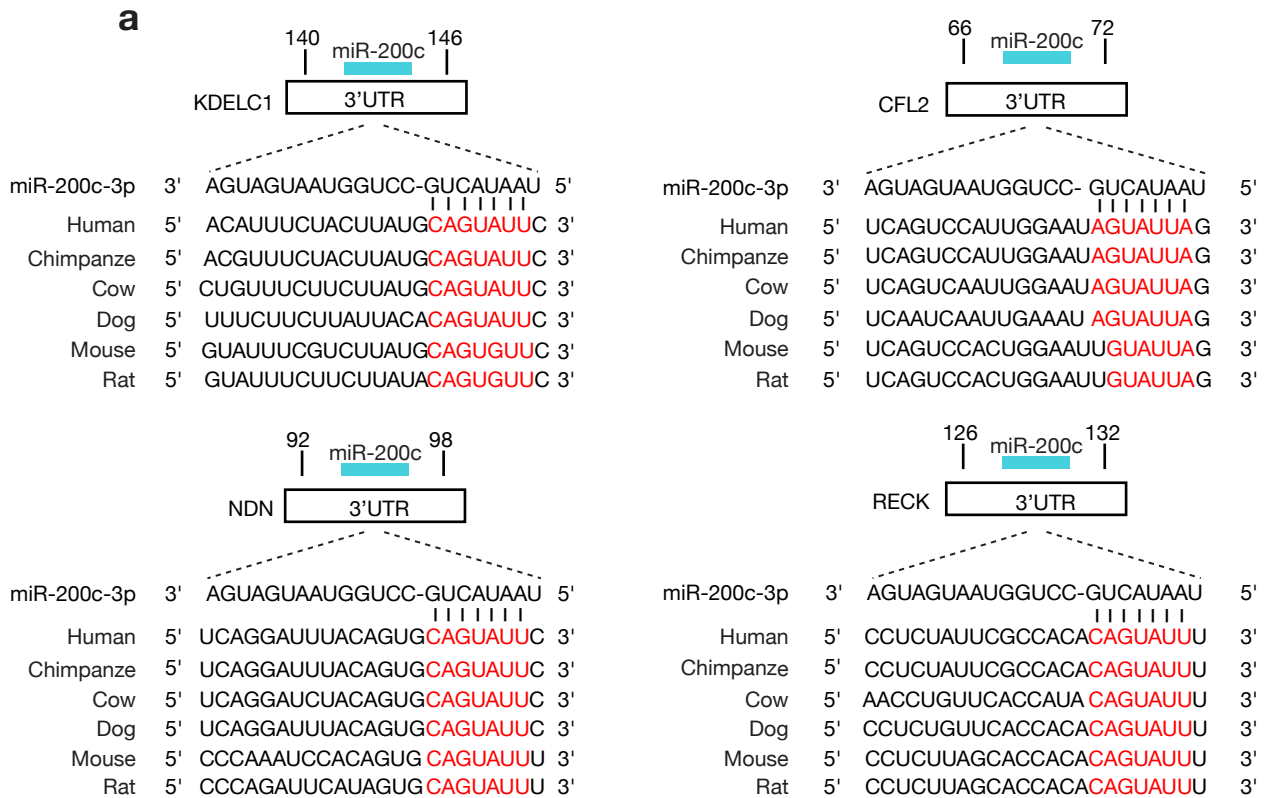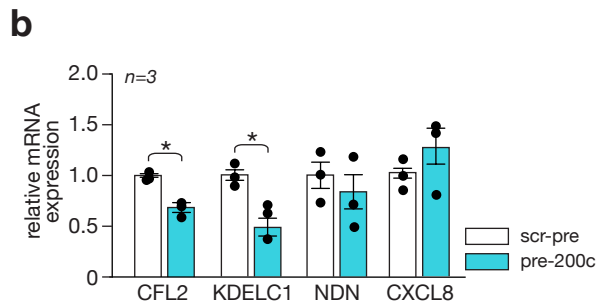

**Supplemental Figure 3 | (a)** Bioinformatic prediction of the miR-200c-3p seed sequence interaction with the 3'-UTR of the downregulated genes revealed by the RNA sequencing and validated by QPCR: KDELC1 (Protein O-Glucosyltransferase 2), CFL2 (Cofilin 2), NDN (Necdin, MAGE Family Member) and RECK (Reversion Inducing Cysteine Rich Protein With Kazal Motifs). **(b)** Real-time PCR analysis of CFL2, KDELC1, NDN and CXCL8 in MPs that were transfected with either a control scrambled precursor (scr) or a precursor molecule for miR-200c-3p (pre-200c). \* $p < 0.05$  versus scr, error bars are s.e.m.

Supplemental Table1: Profiling of microRNAs in CM-derived exosomes by RT-qPCR-based array

| miRNA           | Fold change PE+Iso vs SF |
|-----------------|--------------------------|
| rno-miR-200c-3p | 5,067636345              |
| rno-miR-212-3p  | 4,275339537              |
| mmu-miR-335-3p  | 3,836886264              |
| rno-miR-362-3p  | 3,311392445              |
| rno-miR-30d-3p  | 2,469203943              |
| mmu-miR-345-5p  | 2,392393993              |
| rno-let-7f-1-3p | 2,370763909              |
| mmu-miR-466j    | 2,305577242              |
| mmu-miR-466k    | 2,248652923              |
| rno-miR-204-5p  | 2,243879184              |
| rno-miR-1249    | 2,227465366              |
| mmu-miR-1951    | 2,164179255              |
| rno-miR-338-3p  | 2,043624306              |
| rno-miR-27a-5p  | 2,040865349              |
| mmu-miR-466g    | 2,038492996              |
| rno-miR-872-5p  | 1,9804002                |
| rno-let-7b-3p   | 1,937805805              |
| rno-miR-25-3p   | 1,920183251              |
| mmu-miR-467d-3p | 1,873890952              |
| mmu-miR-1900    | 1,832864329              |
| rno-miR-29a-5p  | 1,819409133              |
| rno-miR-132-3p  | 1,808035494              |
| rno-miR-146b-5p | 1,800229702              |
| rno-miR-667-3p  | 1,798971087              |
| rno-miR-382-3p  | 1,781889656              |
| rno-miR-195-5p  | 1,765732747              |
| rno-miR-347     | 1,721687135              |
| rno-miR-379-3p  | 1,712297047              |
| rno-miR-134-5p  | 1,703267465              |
| rno-miR-15b-3p  | 1,674486796              |
| mmu-miR-503-3p  | 1,651101716              |
| rno-miR-378a-5p | 1,598071547              |
| mmu-miR-669c-5p | 1,579056727              |
| rno-miR-132-5p  | 1,538466469              |
| rno-miR-25-5p   | 1,531335078              |
| mmu-miR-706     | 1,52424731               |
| rno-miR-152-3p  | 1,514236973              |
| rno-miR-340-3p  | 1,493257533              |

rno-miR-151-3p

1,486242984

| miRNA             | Fold change SF vs PE |
|-------------------|----------------------|
| rno-miR-542-5p    | 1,470631712          |
| rno-miR-30e-3p    | 1,405016429          |
| rno-miR-365-3p    | 1,404652244          |
| rno-miR-7a-1-3p   | 1,397949262          |
| mmu-miR-574-3p    | 1,397311816          |
| mmu-miR-1196-5p   | 1,394985378          |
| rno-miR-139-3p    | 1,383788062          |
| rno-miR-23a-3p    | 1,38244971           |
| rno-miR-130b-5p   | 1,366606601          |
| mmu-miR-149-5p    | 1,354563475          |
| rno-miR-322-5p    | 1,353577038          |
| rno-miR-23b-3p    | 1,32475172           |
| rno-miR-374-5p    | 1,318329501          |
| rno-miR-409a-3p   | 1,273364986          |
| mmu-miR-125b-2-3p | 1,256498544          |
| rno-miR-34b-3p    | 1,246189961          |
| rno-miR-21-5p     | 1,238363625          |
| mmu-miR-421-3p    | 1,237933657          |
| mmu-miR-18a-3p    | 1,228502676          |
| mmu-miR-667-3p    | 1,215421738          |
| rno-miR-296-5p    | 1,202363401          |
| rno-miR-499-5p    | 1,193558269          |
| mmu-miR-1195      | 1,186627399          |
| rno-miR-210-3p    | 1,181342256          |
| rno-miR-877       | 1,180610436          |
| rno-miR-342-5p    | 1,180344507          |
| mmu-miR-93-3p     | 1,165041221          |
| rno-miR-320-3p    | 1,164202483          |
| rno-miR-99b-5p    | 1,158998742          |
| mmu-miR-1839-3p   | 1,137870204          |
| rno-miR-872-3p    | 1,133927184          |
| rno-miR-126a-5p   | 1,127329302          |
| rno-miR-99b-3p    | 1,127051156          |
| mmu-miR-3107-5p   | 1,101982261          |
| mmu-miR-27b-5p    | 1,09986694           |
| mmu-miR-466f-3p   | 1,09281031           |
| mmu-miR-1935      | 1,086728083          |
| rno-miR-130a-3p   | 1,083699676          |
| rno-miR-16-5p     | 1,082674072          |
| mmu-miR-297a-3p   | 1,068383796          |

| <b>miRNA</b>    | <b>Fold change SF vs PE</b> |
|-----------------|-----------------------------|
| rno-miR-191a-5p | 1,053133989                 |
| rno-miR-351-5p  | 1,050307668                 |
| rno-miR-376c-3p | 1,048544434                 |
| rno-miR-423-3p  | 1,028925124                 |
| rno-miR-672-5p  | 1,021963733                 |
| mmu-miR-467f    | 1,020245254                 |
| rno-miR-433-3p  | 1,005620524                 |
| rno-miR-146a-5p | -1,013362256                |
| mmu-miR-7a-1-3p | -1,015649067                |
| mmu-miR-223-3p  | -1,022235076                |
| rno-miR-125b-5p | -1,02380645                 |
| rno-miR-125a-5p | -1,026343744                |
| rno-miR-150-5p  | -1,026849679                |
| rno-miR-214-3p  | -1,027533906                |
| rno-miR-99a-5p  | -1,040741662                |
| rno-miR-30a-3p  | -1,043762156                |
| rno-miR-28-3p   | -1,052550169                |
| rno-miR-27b-3p  | -1,058541624                |
| rno-miR-30c-5p  | -1,061577722                |
| rno-miR-26a-5p  | -1,063262636                |
| rno-miR-30d-5p  | -1,067182564                |
| rno-miR-674-3p  | -1,085596519                |
| rno-miR-223-3p  | -1,095782904                |
| rno-miR-382-5p  | -1,097182868                |
| rno-let-7e-3p   | -1,09828616                 |
| rno-miR-140-3p  | -1,100172693                |
| rno-miR-301b-3p | -1,114734392                |
| rno-miR-369-5p  | -1,123619058                |
| rno-miR-187-3p  | -1,137008469                |
| rno-miR-451-5p  | -1,151099066                |
| rno-miR-218a-5p | -1,153145053                |
| rno-miR-29a-3p  | -1,156455698                |
| mmu-miR-1895    | -1,181967199                |
| rno-miR-30a-5p  | -1,192368361                |
| rno-miR-708-5p  | -1,207585216                |
| rno-miR-126a-3p | -1,215334967                |
| mmu-miR-501-5p  | -1,233388244                |
| rno-miR-342-3p  | -1,240872598                |
| rno-let-7d-3p   | -1,245748641                |
| rno-miR-181b-5p | -1,25030754                 |
| rno-miR-139-5p  | -1,251717502                |

rno-miR-434-3p -1,259452751

| miRNA           | Fold change SF vs PE |
|-----------------|----------------------|
| rno-miR-352     | -1,27265555          |
| rno-miR-22-3p   | -1,304747828         |
| rno-miR-1839-5p | -1,305614514         |
| rno-miR-490-3p  | -1,307043358         |
| rno-miR-541-5p  | -1,329174942         |
| mmu-miR-322-3p  | -1,332151349         |
| rno-let-7f-5p   | -1,33558056          |
| mmu-miR-155-5p  | -1,340478426         |
| mmu-miR-675-3p  | -1,343381438         |
| mmu-miR-1905    | -1,344159183         |
| mmu-miR-1957a   | -1,344657735         |
| rno-miR-328a-3p | -1,349321372         |
| rno-miR-411-5p  | -1,351867728         |
| rno-miR-322-3p  | -1,356949471         |
| mmu-miR-1946b   | -1,364461795         |
| mmu-let-7f-1-3p | -1,373558161         |
| rno-let-7e-5p   | -1,374747821         |
| rno-miR-532-3p  | -1,378522677         |
| rno-miR-30b-5p  | -1,38032118          |
| rno-miR-140-5p  | -1,388294846         |
| mmu-miR-483-3p  | -1,398463888         |
| rno-miR-181a-5p | -1,406543333         |
| rno-miR-31a-5p  | -1,409977362         |
| rno-miR-34c-3p  | -1,438266479         |
| rno-miR-93-5p   | -1,463356217         |
| rno-miR-100-5p  | -1,468454943         |
| mmu-miR-214-3p  | -1,470088491         |
| mmu-miR-744-5p  | -1,47321603          |
| rno-miR-199a-3p | -1,474669851         |
| rno-miR-361-5p  | -1,481548649         |
| mmu-miR-351-5p  | -1,48195126          |
| rno-miR-15b-5p  | -1,491716109         |
| mmu-miR-2137    | -1,492598354         |
| rno-miR-20a-5p  | -1,494566406         |
| rno-miR-181d-5p | -1,500488228         |
| rno-miR-483-3p  | -1,501232054         |
| rno-miR-101a-3p | -1,507298342         |
| rno-miR-154-5p  | -1,514938261         |
| rno-miR-24-3p   | -1,535915663         |
| mmu-miR-423-5p  | -1,559895085         |



mmu-miR-324-3p -1,589647624

| miRNA           | Fold change SF vs PE |
|-----------------|----------------------|
| rno-miR-379-5p  | -1,591128111         |
| rno-let-7d-5p   | -1,604019855         |
| rno-miR-194-5p  | -1,605790852         |
| rno-miR-301a-3p | -1,64246087          |
| rno-miR-185-5p  | -1,658359743         |
| rno-miR-425-5p  | -1,680386383         |
| rno-miR-186-5p  | -1,708607476         |
| rno-miR-199a-5p | -1,717767761         |
| mmu-miR-455-3p  | -1,721652527         |
| rno-miR-455-5p  | -1,725666885         |
| rno-miR-27a-3p  | -1,781677229         |
| rno-miR-1-3p    | -1,782319526         |
| rno-miR-133a-3p | -1,82009531          |
| mmu-miR-350-3p  | -1,830250349         |
| rno-miR-222-3p  | -1,83233336          |
| rno-miR-221-3p  | -1,848807478         |
| rno-miR-350     | -1,876738965         |
| rno-miR-466b-5p | -1,893844659         |
| mmu-miR-709     | -1,895042232         |
| rno-miR-18a-5p  | -1,908622784         |
| rno-let-7a-5p   | -1,920074115         |
| mmu-miR-409-3p  | -1,921966247         |
| rno-miR-101b-3p | -2,013510506         |
| rno-miR-330-3p  | -2,041816195         |
| rno-miR-26b-5p  | -2,056651002         |
| mmu-miR-466f    | -2,06782343          |
| mmu-miR-1946a   | -2,067880763         |
| rno-miR-378a-3p | -2,08205907          |
| rno-let-7c-5p   | -2,105256472         |
| rno-miR-30e-5p  | -2,121674            |
| rno-miR-145-5p  | -2,135694068         |
| rno-miR-450a-5p | -2,148145925         |
| mmu-miR-146b-5p | -2,207883424         |
| rno-miR-151-5p  | -2,22691424          |
| rno-miR-133b-3p | -2,272571996         |
| rno-miR-484     | -2,290178423         |
| mmu-miR-143-3p  | -2,29845433          |
| mmu-miR-148a-3p | -2,309097354         |
| rno-miR-107-3p  | -2,32155265          |
| mmu-miR-1a-3p   | -2,325026243         |

rno-miR-148b-3p                      -2,343264808

| <b>miRNA</b>    | <b>Fold change SF vs PE</b> |
|-----------------|-----------------------------|
| rno-miR-299a-5p | -2,382235433                |
| rno-miR-208a-5p | -2,390225944                |
| rno-miR-532-5p  | -2,499322376                |
| rno-miR-192-5p  | -2,539902294                |
| rno-miR-335     | -2,544639                   |
| rno-miR-28-5p   | -2,581178654                |
| rno-miR-103-3p  | -2,614574175                |
| rno-miR-760-5p  | -2,708665045                |
| rno-miR-652-3p  | -2,744253963                |
| mmu-miR-450a-5p | -2,816149649                |
| rno-miR-665     | -2,833173592                |
| rno-miR-106b-5p | -2,855768434                |
| mmu-miR-208b-3p | -2,866876983                |
| mmu-miR-193b-3p | -2,997697901                |
| rno-miR-143-3p  | -3,013552085                |
| rno-miR-106b-3p | -3,256524318                |
| rno-miR-298-5p  | -3,260840782                |
| rno-miR-127-3p  | -3,34310577                 |
| mmu-miR-15a-5p  | -3,456217478                |
| mmu-let-7g-5p   | -3,630363477                |
| rno-miR-31a-3p  | -4,169287908                |
| mmu-miR-1186a   | -5,091959696                |
| rno-let-7i-5p   | -5,200001358                |
| mmu-miR-1983    | -5,869538199                |
| rno-let-7b-5p   | -15,71206611                |

SF: serum-free; PE: Phenylephrine; Iso: Isoproterenol

Supplemental Table2: Validation of the 5 most enriched microRNAs from the profiling of CM-derived exosomes by RT-qPCR-based array, after treating EV samples with RNase +/- Triton X-100. Data represent fold change PE+Iso vs SF.

| miRNA       | Treatment |                    |                    |                         |
|-------------|-----------|--------------------|--------------------|-------------------------|
|             | -         | RNase A            | Triton X-100       | RNase A<br>Triton X-100 |
| miR-200c-3p | 4,992*    | 4,631*             | 3,902*             | 0,528 <sup>#,1</sup>    |
| miR-212-3p  | 3,775*    | 3,237*             | 2,933*             | 0,663 <sup>#,1</sup>    |
| miR-335-3p  | 3,356*    | 1,412 <sup>#</sup> | 1,101 <sup>#</sup> | 0,909 <sup>#,1</sup>    |
| miR-362-3p  | 3,002*    | 1,258 <sup>#</sup> | 0,932 <sup>#</sup> | 0,025 <sup>#,1</sup>    |
| miR-30d-3p  | 2,092*    | 1,967*             | 1,366 <sup>#</sup> | 0,199 <sup>#,1</sup>    |

SF: serum-free; PE: Phenylephrine; Iso: Isoproterenol

\*p<0.05 versus the SF samples

<sup>#</sup>p<0.05 versus untreated samples (-)

<sup>1</sup>p<0.05 versus RNase A treatment

Supplemental Table 3: Sequencing of RNA derived from HUVEC's after transfection with pre-miR-200c-3p

| Ensembl gene ID | log2FoldChange     | p value              | HGNC symbol | gene biotype   |
|-----------------|--------------------|----------------------|-------------|----------------|
| ENSG00000103160 | -0.591364037959192 | 0.00150792681144476  | HSDL1       | protein_coding |
| ENSG00000110756 | -0.593149772648068 | 6,41E+00             | HPS5        | protein_coding |
| ENSG00000196372 | -0.598231882502013 | 0.00099205581547257  | ASB13       | protein_coding |
| ENSG00000123728 | -0.599305304458973 | 6,71E-04             | RAP2C       | protein_coding |
| ENSG00000107560 | -0.60131565512048  | 2,22E+05             | RAB11FIP2   | protein_coding |
| ENSG00000162407 | -0.603787197038826 | 6,77E-01             | PLPP3       | protein_coding |
| ENSG00000122376 | -0.605177114686447 | 0.000490923112321308 | FAM35A      | protein_coding |
| ENSG00000197632 | -0.605304059164926 | 8,37E-02             | SERPINB2    | protein_coding |
| ENSG00000158859 | -0.606236442105014 | 1,83E+02             | ADAMTS4     | protein_coding |
| ENSG00000141232 | -0.607417431334612 | 0.000498961034852149 | TOB1        | protein_coding |
| ENSG00000165757 | -0.621272841412988 | 1,16E-12             | JCAD        | protein_coding |
| ENSG00000135723 | -0.621984560623499 | 1,94E+00             | FHOD1       | protein_coding |
| ENSG00000075618 | -0.626881593836077 | 0.000808569542827331 | FSCN1       | protein_coding |
| ENSG00000141682 | -0.63267563566931  | 2,34E+04             | PMAIP1      | protein_coding |
| ENSG00000104967 | -0.63670990808039  | 3,38E+05             | NOVA2       | protein_coding |
| ENSG00000115216 | -0.637622352764944 | 3,85E-26             | NRBP1       | protein_coding |
| ENSG00000134242 | -0.637911293732313 | 1,63E+07             | PTPN22      | protein_coding |
| ENSG00000134954 | -0.640894382045728 | 2,36E-29             | ETS1        | protein_coding |
| ENSG00000136237 | -0.651314277580284 | 4,14E-21             | RAPGEF5     | protein_coding |
| ENSG00000115935 | -0.652976698795794 | 6,87E+07             | WIPF1       | protein_coding |
| ENSG00000270607 | -0.656112296130271 | 0.000972051147940525 |             | lincRNA        |
| ENSG00000186106 | -0.66404056554468  | 1,14E+09             | ANKRD46     | protein_coding |
| ENSG00000182287 | -0.66519899272896  | 5,51E-05             | AP1S2       | protein_coding |
| ENSG00000153814 | -0.679444210542959 | 4,57E+08             | JAZF1       | protein_coding |

| Ensembl gene ID | log2FoldChange     | p value              | HGNC symbol | gene biotype                     |
|-----------------|--------------------|----------------------|-------------|----------------------------------|
| ENSG00000171055 | -0.680483329367485 | 0.00316714672374411  | FEZ2        | protein_coding                   |
| ENSG00000158156 | -0.683761550972862 | 6,16E+08             | XKR8        | protein_coding                   |
| ENSG00000164938 | -0.685141958212356 | 2,33E+05             | TP53INP1    | protein_coding                   |
| ENSG00000150510 | -0.685850211689224 | 0.000129179438374966 | FAM124A     | protein_coding                   |
| ENSG00000248187 | -0.689377509247583 | 9,23E+09             |             | lincRNA                          |
| ENSG00000183722 | -0.691237181490188 | 4,60E+01             | LHFPL6      | protein_coding                   |
| ENSG00000056050 | -0.697733571610229 | 2,19E+02             | HPF1        | protein_coding                   |
| ENSG00000103241 | -0.698206740734348 | 8,39E+07             | FOXF1       | protein_coding                   |
| ENSG00000145388 | -0.710000067670269 | 0.000710639886527536 | METTL14     | protein_coding                   |
| ENSG00000104368 | -0.710748130790017 | 1,34E-20             | PLAT        | protein_coding                   |
| ENSG00000180398 | -0.713377999765962 | 1,80E-03             | MCFD2       | protein_coding                   |
| ENSG00000243243 | -0.717520180245784 | 0.00283816865931245  |             | antisense                        |
| ENSG00000100034 | -0.741540796858184 | 0.000121927740260567 | PPM1F       | protein_coding                   |
| ENSG00000150867 | -0.749200930499433 | 6,08E-15             | PIP4K2A     | protein_coding                   |
| ENSG00000164283 | -0.754900111991758 | 4,66E-95             | ESM1        | protein_coding                   |
| ENSG00000108960 | -0.759231192134464 | 2,62E+09             | MMD         | protein_coding                   |
| ENSG00000159167 | -0.765212436110676 | 1,14E+05             | STC1        | protein_coding                   |
| ENSG00000165424 | -0.779745701013421 | 0.00201887073644037  | ZCCHC24     | protein_coding                   |
| ENSG00000100292 | -0.788032912686648 | 1,56E-08             | HMOX1       | protein_coding                   |
| ENSG00000280852 | -0.797362410679192 | 8,05E+09             |             | transcribed_processed_pseudogene |
| ENSG00000134901 | -0.800065837046592 | 1,50E+01             | KDEL1C1     | protein_coding                   |
| ENSG00000122707 | -0.80422437712145  | 8,85E+00             | RECK        | protein_coding                   |
| ENSG00000124333 | -0.821164006970525 | 0.001063926300418    | VAMP7       | protein_coding                   |
| ENSG00000163739 | -0.830247617837695 | 7,87E-09             | CXCL1       | protein_coding                   |
| ENSG00000100934 | -0.853513747856206 | 2,65E-86             | SEC23A      | protein_coding                   |

| Ensembl gene ID | log2FoldChange       | p value              | HGNC symbol | gene biotype         |
|-----------------|----------------------|----------------------|-------------|----------------------|
| ENSG00000140379 | -0.86894797673122    | 8,70E+08             | BCL2A1      | protein_coding       |
| ENSG00000148288 | -0.869143781021503   | 0.00242307235870447  | GBGT1       | protein_coding       |
| ENSG00000099804 | -0.887349197992863   | 0.000133885541031604 | CDC34       | protein_coding       |
| ENSG00000121274 | -0.89027325793549    | 0.000650387915915273 | PAPD5       | protein_coding       |
| ENSG00000235105 | -0.892930043223598   | 0.00180970672071792  |             | processed_pseudogene |
| ENSG00000213390 | -0.900833404713182   | 2,94E-26             | ARHGAP19    | protein_coding       |
| ENSG00000089041 | -0.909789402061331   | 0.000452307810181628 | P2RX7       | protein_coding       |
| ENSG00000204386 | -0.93303469460238    | 0.00011623984562505  | NEU1        | protein_coding       |
| ENSG00000186666 | -0.934758512416185   | 0.000918937448595612 | BCDIN3D     | protein_coding       |
| ENSG00000066117 | -0.942415695936093   | 0.00200425715314589  | SMARCD1     | protein_coding       |
| ENSG00000113083 | -0.942955323350405   | 2,12E-48             | LOX         | protein_coding       |
| ENSG00000169429 | -0.951718455000476   | 8,00E-07             | CXCL8       | protein_coding       |
| ENSG00000082146 | -0.963907300080235   | 8,34E+06             | STRADB      | protein_coding       |
| ENSG00000154582 | -0.976291678587739   | 0.00142983361986796  | ELOC        | protein_coding       |
| ENSG00000128699 | -100.133.118.120.163 | 0.00014654224109863  | ORMDL1      | protein_coding       |
| ENSG00000189227 | -108.912.192.975.236 | 0.000705642432144648 | C15orf61    | protein_coding       |
| ENSG00000165410 | -108.956.209.785.806 | 0.000771928395160165 | CFL2        | protein_coding       |
| ENSG00000174899 | -11.005.851.578.077  | 0.0030255284717621   | PQLC2L      | protein_coding       |
| ENSG00000144476 | -110.725.877.058.259 | 4,11E+06             | ACKR3       | protein_coding       |
| ENSG00000081041 | -111.488.680.049.059 | 0.00085847221559386  | CXCL2       | protein_coding       |
| ENSG00000174684 | -114.633.690.815.927 | 4,03E-13             | B4GAT1      | protein_coding       |
| ENSG00000171984 | -116.312.178.158.406 | 0.00245338994406232  | C20orf196   | protein_coding       |
| ENSG00000188906 | -119.379.705.893.357 | 0.00233901922680108  | LRRK2       | protein_coding       |
| ENSG00000081087 | -127.889.073.859.194 | 1,30E-24             | OSTM1       | protein_coding       |
| ENSG00000184752 | -130.871.675.497.707 | 4,31E+09             | NDUFA12     | protein_coding       |

| Ensembl gene ID | log2FoldChange       | p value              | HGNC symbol    | gene biotype                     |
|-----------------|----------------------|----------------------|----------------|----------------------------------|
| ENSG00000182636 | -131.846.373.876.123 | 1,34E+03             | NDN            | protein_coding                   |
| ENSG00000130222 | -164.387.092.700.388 | 0.000185517498734289 | GADD45G        | protein_coding                   |
| ENSG00000233369 | -115.398.276.571.192 | 2,30E+09             | GTF2IP4        | transcribed_processed_pseudogene |
| ENSG00000175548 | -261.527.568.524.707 | 6,27E+08             | ALG10B         | protein_coding                   |
| ENSG00000203818 | -371.705.388.658.652 | 0.00248477454188882  | HIST2H3PS2     | protein_coding                   |
| ENSG00000108825 | -798.500.922.795.109 | 0.000711010460224698 | PTGES3L-AARSD1 | protein_coding                   |
| ENSG00000213943 | 0.587985889243156    | 0.00143606925852977  | KRT18P17       | processed_pseudogene             |
| ENSG00000168209 | 0.597576149699436    | 3,63E+07             | DDIT4          | protein_coding                   |
| ENSG00000106537 | 0.597733187547293    | 0.00271860790446437  | TSPAN13        | protein_coding                   |
| ENSG00000158985 | 0.599413920593871    | 0.00011756361645188  | CDC42SE2       | protein_coding                   |
| ENSG00000141562 | 0.601630815908915    | 8,35E+07             | NARF           | protein_coding                   |
| ENSG00000159388 | 0.605083542421654    | 2,15E+05             | BTG2           | protein_coding                   |
| ENSG00000175264 | 0.605394773874569    | 0.000425227233274914 | CHST1          | protein_coding                   |
| ENSG00000128203 | 0.608075798747928    | 0.00358504593234682  | ASPHD2         | protein_coding                   |
| ENSG00000105810 | 0.61464021186409     | 2,22E-04             | CDK6           | protein_coding                   |
| ENSG00000071575 | 0.614799634644943    | 2,07E+07             | TRIB2          | protein_coding                   |
| ENSG00000184675 | 0.615242519591055    | 0.00347933909127795  | AMER1          | protein_coding                   |
| ENSG00000146072 | 0.619280996948098    | 6,36E-04             | TNFRSF21       | protein_coding                   |
| ENSG00000111912 | 0.61968828234916     | 0.000864792941856614 | NCOA7          | protein_coding                   |
| ENSG00000133874 | 0.621597846662272    | 0.00292785749612483  | RNF122         | protein_coding                   |
| ENSG00000099889 | 0.623787847627552    | 3,41E+07             | ARVCF          | protein_coding                   |
| ENSG00000181284 | 0.624906683421293    | 0.000634940110011621 | TMEM102        | protein_coding                   |
| ENSG00000171105 | 0.63338896415052     | 0.000118590438818491 | INSR           | protein_coding                   |
| ENSG00000133083 | 0.633480118511122    | 0.00122840931823547  | DCLK1          | protein_coding                   |

| Ensembl gene ID | log2FoldChange    | p value              | HGNC symbol | gene biotype      |
|-----------------|-------------------|----------------------|-------------|-------------------|
| ENSG00000149573 | 0.635903324962663 | 6,98E-05             | MPZL2       | protein_coding    |
| ENSG00000114315 | 0.639329867172576 | 0.000362165823867606 | HES1        | protein_coding    |
| ENSG00000188811 | 0.645293609097237 | 6,20E+08             | NHLRC3      | protein_coding    |
| ENSG00000078081 | 0.645867575767101 | 0.000393256554110373 | LAMP3       | protein_coding    |
| ENSG00000135269 | 0.648160553582652 | 0.000169176025570413 | TES         | protein_coding    |
| ENSG00000086712 | 0.660681064612718 | 1,80E+03             | TXLNG       | protein_coding    |
| ENSG00000133627 | 0.662505954940455 | 0.000657579181075589 | ACTR3B      | protein_coding    |
| ENSG00000165959 | 0.663799814988615 | 0.00120925231672195  | CLMN        | protein_coding    |
| ENSG00000259623 | 0.670767186945949 | 5,42E+06             |             | sense_overlapping |
| ENSG00000161040 | 0.67358456978045  | 0.00152552273840014  | FBXL13      | protein_coding    |
| ENSG00000171791 | 0.675547396187128 | 0.00260434587644589  | BCL2        | protein_coding    |
| ENSG00000056972 | 0.67565456640837  | 9,11E+06             | TRAF3IP2    | protein_coding    |
| ENSG00000139116 | 0.67983971368407  | 8,95E+04             | KIF21A      | protein_coding    |
| ENSG00000052795 | 0.681422467875935 | 2,23E-07             | FNIP2       | protein_coding    |
| ENSG00000135622 | 0.687821070340484 | 0.000823591307269312 | SEMA4F      | protein_coding    |
| ENSG00000135480 | 0.694500843303269 | 2,75E-21             | KRT7        | protein_coding    |
| ENSG00000105976 | 0.702626515318126 | 3,27E+08             | MET         | protein_coding    |
| ENSG00000197971 | 0.711908232037634 | 0.00056707347917147  | MBP         | protein_coding    |
| ENSG00000198517 | 0.712870965568924 | 0.00335009252507504  | MAFK        | protein_coding    |
| ENSG00000116138 | 0.714960094695562 | 0.00200660040730662  | DNAJC16     | protein_coding    |
| ENSG00000101665 | 0.715631107894264 | 0.00023583164924336  | SMAD7       | protein_coding    |
| ENSG00000179456 | 0.716797633744359 | 1,28E-02             | ZBTB18      | protein_coding    |
| ENSG00000166897 | 0.730378898110816 | 1,03E+07             | ELFN2       | protein_coding    |
| ENSG00000104450 | 0.741572979313027 | 1,78E+07             | SPAG1       | protein_coding    |
| ENSG00000198740 | 0.744785465059016 | 0.00313271110824812  | ZNF652      | protein_coding    |



| Ensembl gene ID | log2FoldChange    | <i>p</i> value       | HGNC symbol | gene biotype   |
|-----------------|-------------------|----------------------|-------------|----------------|
| ENSG00000272617 | 0.754966875730222 | 0.000646416122262426 |             | protein_coding |
| ENSG00000147894 | 0.762812325658864 | 1,43E+09             | C9orf72     | protein_coding |
| ENSG00000126970 | 0.767354796253669 | 0.000204413052166175 | ZC4H2       | protein_coding |
| ENSG00000189164 | 0.770003674001871 | 0.000947802308902116 | ZNF527      | protein_coding |
| ENSG00000169087 | 0.771718269761412 | 0.000831946551216924 | HSPBAP1     | protein_coding |
| ENSG00000136869 | 0.772313908407749 | 1,03E-03             | TLR4        | protein_coding |
| ENSG00000049759 | 0.777335081252865 | 1,39E+03             | NEDD4L      | protein_coding |
| ENSG00000108179 | 0.779839904902356 | 2,84E-15             | PPIF        | protein_coding |
| ENSG00000196323 | 0.784009024330427 | 0.000379071300384087 | ZBTB44      | protein_coding |
| ENSG00000213983 | 0.806239906663446 | 3,87E+09             | AP1G2       | protein_coding |
| ENSG00000124120 | 0.806280814532387 | 0.00270840081316325  | TTPAL       | protein_coding |
| ENSG00000235109 | 0.814265656748186 | 0.000313307761566796 | ZSCAN31     | protein_coding |
| ENSG00000120756 | 0.818594935408422 | 0.00246610215567427  | PLS1        | protein_coding |
| ENSG00000164463 | 0.819417163482375 | 0.000173076613655866 | CREBRF      | protein_coding |
| ENSG00000102385 | 0.820928747145759 | 0.00207331711430881  | DRP2        | protein_coding |
| ENSG00000189410 | 0.82739787936999  | 0.00020133873702774  | SH2D5       | protein_coding |
| ENSG00000275993 | 0.828592037196402 | 0.00149390720887599  | SIK1B       | protein_coding |
| ENSG00000145358 | 0.829478236681893 | 0.000758326610682258 | DDIT4L      | protein_coding |
| ENSG00000079691 | 0.832162248646532 | 0.000685420020323039 | CARMIL1     | protein_coding |
| ENSG00000173065 | 0.843354190826361 | 0.000355873413628068 | FAM222B     | protein_coding |
| ENSG00000145287 | 0.846133706398049 | 0.000107321044405404 | PLAC8       | protein_coding |
| ENSG00000146083 | 0.861397768386269 | 6,85E+09             | RNF44       | protein_coding |
| ENSG00000071967 | 0.867753502114203 | 4,61E-10             | CYBRD1      | protein_coding |
| ENSG00000143367 | 0.871287908534822 | 4,60E+08             | TUFT1       | protein_coding |
| ENSG00000198889 | 0.871641167069611 | 1,57E+07             | DCAF12L1    | protein_coding |
| ENSG00000197375 | 0.879739160438194 | 0.00108575514735103  | SLC22A5     | protein_coding |

| Ensembl gene ID | log2FoldChange      | <i>p</i> value       | HGNC symbol | gene biotype                     |
|-----------------|---------------------|----------------------|-------------|----------------------------------|
| ENSG00000164976 | 0.882899518443072   | 8,93E+03             | MYORG       | protein_coding                   |
| ENSG00000102554 | 0.901966283293466   | 2,33E+07             | KLF5        | protein_coding                   |
| ENSG00000165244 | 0.912008496336801   | 2,24E-13             | ZNF367      | protein_coding                   |
| ENSG00000185697 | 0.914373361299223   | 4,35E+08             | MYBL1       | protein_coding                   |
| ENSG00000100625 | 0.915571283177859   | 5,65E+03             | SIX4        | protein_coding                   |
| ENSG00000269609 | 0.920571218499544   | 0.000410727287964765 | RPARP-AS1   | processed_transcript             |
| ENSG00000240891 | 0.930335744895033   | 1,01E+04             | PLCXD2      | protein_coding                   |
| ENSG00000057294 | 0.93724227536298    | 7,76E+05             | PKP2        | protein_coding                   |
| ENSG00000125378 | 0.942211861853582   | 1,53E+08             | BMP4        | protein_coding                   |
| ENSG00000138771 | 0.943147091962238   | 5,31E+08             | SHROOM3     | protein_coding                   |
| ENSG00000163251 | 0.945621003563649   | 5,68E+06             | FZD5        | protein_coding                   |
| ENSG00000166908 | 0.95205237199239    | 7,28E+06             | PIP4K2C     | protein_coding                   |
| ENSG00000173875 | 0.993146904062026   | 4,25E+08             | ZNF791      | protein_coding                   |
| ENSG00000109906 | 100.653.186.569.371 | 0.00373320958517015  | ZBTB16      | protein_coding                   |
| ENSG00000118804 | 100.689.524.668.013 | 0.000671545467164105 | STBD1       | protein_coding                   |
| ENSG00000100784 | 10.202.879.899.399  | 0.000395293721925771 | RPS6KA5     | protein_coding                   |
| ENSG00000173156 | 103.418.738.921.649 | 8,82E+07             | RHOD        | protein_coding                   |
| ENSG00000065923 | 104.429.347.454.235 | 0.000190349841503729 | SLC9A7      | protein_coding                   |
| ENSG00000255624 | 105.104.019.157.999 | 0.00132086863113063  |             | transcribed_processed_pseudogene |
| ENSG00000114529 | 10.894.219.485.309  | 7,49E+08             | C3orf52     | protein_coding                   |
| ENSG00000174640 | 109.222.344.769.868 | 3,54E+09             | SLCO2A1     | protein_coding                   |
| ENSG00000128833 | 109.394.110.723.591 | 0.000126906591239205 | MYO5C       | protein_coding                   |
| ENSG00000164114 | 110.232.815.152.113 | 0.000111118811316268 | MAP9        | protein_coding                   |
| ENSG00000184117 | 110.955.779.713.758 | 3,18E+09             | NIPSNAP1    | protein_coding                   |

| Ensembl gene ID | log2FoldChange      | <i>p</i> value       | HGNC symbol | gene biotype   |
|-----------------|---------------------|----------------------|-------------|----------------|
| ENSG00000106852 | 111.018.931.503.806 | 0.000741184495667419 | LHX6        | protein_coding |
| ENSG00000111424 | 111.905.406.208.171 | 0.000500877211699353 | VDR         | protein_coding |
| ENSG00000177076 | 115.567.460.980.479 | 4,49E+09             | ACER2       | protein_coding |
| ENSG00000183691 | 116.458.960.124.156 | 9,62E+08             | NOG         | protein_coding |
| ENSG00000126562 | 118.139.889.845.957 | 4,10E+09             | WNK4        | protein_coding |
| ENSG00000106692 | 121.396.569.250.191 | 0.00364133386971977  | FKTN        | protein_coding |
| ENSG00000101306 | 130.777.180.411.487 | 5,01E+09             | MYLK2       | protein_coding |
| ENSG00000132849 | 130.810.533.276.893 | 6,60E+07             | PATJ        | protein_coding |
| ENSG00000116675 | 131.254.398.910.589 | 1,32E+07             | DNAJC6      | protein_coding |
| ENSG00000120337 | 135.159.147.530.903 | 2,09E-29             | TNFSF18     | protein_coding |
| ENSG00000168672 | 137.989.925.365.319 | 3,38E-03             | FAM84B      | protein_coding |
| ENSG00000144228 | 138.625.190.267.157 | 0.000680594872415992 | SPOPL       | protein_coding |
| ENSG00000182272 | 14.367.059.723.608  | 0.00152732022881098  | B4GALNT4    | protein_coding |
| ENSG00000233251 | 147.867.702.708.974 | 0.000903066635845831 |             | antisense      |
| ENSG00000153094 | 15.543.062.223.722  | 0.000414952569581912 | BCL2L11     | protein_coding |
| ENSG00000156675 | 180.539.412.249.995 | 1,90E+07             | RAB11FIP1   | protein_coding |
| ENSG00000281344 | 238.628.511.469.846 | 0.00182228114766388  | HELLPAR     | macro_lncRNA   |
| ENSG00000130962 | 242.298.868.383.795 | 0.000736762505129227 | PRRG1       | protein_coding |
| ENSG00000260342 | 217.853.106.939.651 | 2,72E+07             |             | protein_coding |
| ENSG00000280987 | 535.111.111.826.855 | 0.000921383418837557 |             | protein_coding |

HGNC: Hugo Gene Nomenclature Committee

Supplemental Table 4: Functional high throughput screening to detect siRNAs that interfere with endothelial cell proliferation

| <b>Gene</b> | <b>% of EdU<sup>+</sup>/MOCK</b> |
|-------------|----------------------------------|
| CFL2        | -3,98987677                      |
| KDELC1      | -2,230166603                     |
| CXCL8       | -2,209103936                     |
| RECK        | -1,75987419                      |
| NDN         | -1,253524168                     |
| AP1S2       | -1,222723063                     |
| FSCN1       | -0,918793167                     |
| MAPK6       | -0,954316891                     |
| ESM1        | -1,063123001                     |
| METTL14     | -0,036903739                     |
| RAPGEF5     | -0,455887281                     |
| ADAMTS4     | -0,498518832                     |
| ETS1        | -0,159134882                     |
| PAPD5       | -0,677151277                     |
| PLAT        | -0,693904435                     |
| LHFPL6      | -0,263460242                     |
| XKR8        | -0,389453135                     |
| FAM35A      | -0,797723838                     |
| PIP4K2A     | -0,298745764                     |
| FHOD1       | -0,176601637                     |
| OSTM1       | -0,426871998                     |
| PMAIP1      | -0,54783802                      |
| HMOX1       | -0,017324709                     |
| PTPN22      | 0,100539101                      |
| SERPIN      | 0,280522663                      |
| P2RX7       | -0,256724754                     |
| GADD45G     | -0,161200014                     |
| ZCCHC24     | 0,056511913                      |
| LOX         | 0,204688623                      |
| STRADB      | 0,259235377                      |
| STC1        | 0,401802716                      |

EdU: 5'-Ethylnyl-2'-deoxyuridine

MOCK: scrambled siRNA, control
